# Supplementary material for: Talking about Health: A Topic Analysis of Narratives from Individuals with Schizophrenia and Other Serious Mental Illnesses
Source: MDPI journal article supplement (doi:10.3390/bs12080286), 2022-08-13
Supplement: s1 [file s1]

**Supplementary Table S1. Frequency counts for different groups and top 10 descriptive text were assigned nicknames based on qualitative insights**

| Topic | Nickname | Control | Schizophrenia | SMI Other | Black | Other | White |
|-------|----------|---------|---------------|-----------|-------|-------|-------|
| -1    | -        | 60      | 278           | 83        | 134   | 7     | 209   |
| 0*    | food     | 33      | 41            | 30        | 36    | 2     | 51    |
| 1*    | hobbies  | 28      | 38            | 32        | 34    | 2     | 44    |
| 2     | peace    | 26      | 33            | 24        | 23    | 3     | 40    |
| 3     | routine  | 0       | 68            | 2         | 7     | 0     | 36    |
| 4     | memories | 7       | 58            | 5         | 22    | 0     | 26    |
| 5     | home     | 0       | 28            | 26        | 13    | 2     | 22    |
| 6     | life     | 0       | 28            | 21        | 22    | 0     | 17    |
| 7     | home     | 21      | 13            | 14        | 6     | 2     | 27    |
| 8     | happy    | 12      | 18            | 5         | 14    | 0     | 22    |
| 9     | sad      | 6       | 17            | 8         | 4     | 0     | 17    |
| 10*   | scared   | 2       | 26            | 2         | 1     | 0     | 28    |
| 11    | -        | 1       | 27            | 0         | 10    | 1     | 8     |
| 12    | angry    | 14      | 8             | 4         | 6     | 0     | 14    |
| 13*   | religion | 3       | 8             | 14        | 3     | 1     | 10    |
| 14    | -        | 0       | 17            | 8         | 5     | 1     | 11    |
| 15    | work     | 0       | 21            | 1         | 1     | 0     | 10    |
| 16    | -        | 0       | 21            | 0         | 8     | 1     | 6     |
| 17    | -        | 2       | 12            | 4         | 3     | 0     | 11    |
| 18    | -        | 6       | 7             | 2         | 8     | 0     | 6     |
| 19    | -        | 2       | 7             | 5         | 4     | 0     | 8     |
| 20    | -        | 0       | 13            | 0         | 5     | 0     | 10    |
| 21    | -        | 3       | 8             | 2         | 2     | 0     | 7     |
| 22    | -        | 3       | 7             | 3         | 8     | 0     | 1     |
| 23    | -        | 2       | 4             | 4         | 3     | 0     | 7     |
| 24    | -        | 0       | 9             | 0         | 4     | 0     | 7     |
| 25    | -        | 1       | 5             | 3         | 0     | 0     | 5     |
| 26    | -        | 1       | 7             | 1         | 2     | 1     | 5     |
| 27    | -        | 1       | 2             | 5         | 0     | 0     | 7     |
| 28    | mind     | 0       | 2             | 6         | 1     | 0     | 8     |
| 29    | -        | 1       | 7             | 0         | 5     | 0     | 2     |
| 30    | -        | 0       | 8             | 0         | 5     | 0     | 1     |
| 31    | -        | 2       | 4             | 2         | 2     | 0     | 5     |
| 32    | -        | 5       | 3             | 0         | 2     | 0     | 3     |
| 33*   | mental   | 0       | 4             | 3         | 4     | 0     | 2     |
| 34    | -        | 0       | 7             | 0         | 2     | 2     | 3     |
| 35    | -        | 0       | 3             | 4         | 2     | 0     | 4     |
| 36    | -        | 0       | 5             | 1         | 4     | 0     | 4     |
| 37*   | time     | 0       | 6             | 0         | 4     | 0     | 3     |
| 38    | -        | 2       | 4             | 0         | 3     | 0     | 4     |
| 39    | -        | 0       | 3             | 3         | 3     | 0     | 4     |
| 40    | -        | 1       | 2             | 2         | 2     | 1     | 2     |
| 41    | -        | 2       | 2             | 1         | 0     | 0     | 3     |

---

criptive words for each topic. An asterisk (\*) is placed next to health-related topics. Topics mentioned in the main  
peciton of the top 10 words. N.B. Topic "-1" is a "catch-all topic" and should be ignored.

---

#### Top 10 Words

---

know, just, got, did, really, going, time, lot, good, kind  
food, eat, cook, love, chicken, cooking, good, eating, favorite, lot  
hobbies, hobby, play, watch, love, just, read, lot, music, favorite  
peace, feel, just, relaxed, outside, calm, felt, really, peaceful, good  
usually, work, day, know, just, home, O, time, ah, watch  
know, fun, just, good, went, lot, used, memories, time, remember  
know, people, think, ah, just, person, things, lot, time, kind  
know, ah, just, got, people, want, life, going, yes, good  
room, live, bedroom, living, kitchen, house, living room, nice, roommate, tv  
happy, really, time, just, know, good, got, used, did, real  
sad, felt, low, energy, feel, low energy, feel sad, passed, times, away  
know, did, bad, snake, crap, got, time, going, sad, went  
know, just, got, yeah, going, really, lot, time, want, stuff  
furious, angry, youknow, really, disgusted, just, person, mad, upset, people  
church, know, god, things, just, wood, bible, say, people, think  
years, just, lot, work, sss, know, kind, really, time, going  
know, really, going, new, just, kind, got, trying, time, work  
know, just, bad, really, did, time, people, things, kind, think  
happy, really happy, best, really, special, times, feeling best, really special, feel, feeling  
died, just, funeral, hard, away, did, going, time, know, passed away  
live, woodbury, ill, river oaks, oaks, good, living, place, river, love  
stressful, know, did, stress, time, lot, bad, got, going, died  
fish, fishing, fun, just, know, ah, really, mean, kind, boat  
dog, cat, youknow, rat, vet, day, rid, growl, pet, imean  
just, sick, felt, hospital, kind, bad, rrlke, stuff, blood, know  
3E+36, 393c 3e36, 393c, just, know, let, got, kind, stuff, things  
okay, ring ring, got, ring, fight, ring ring ring, school, angry, classroom, funny  
know, want, lot, month, feel, things, going, people, just, think  
scared, disgusted, feel, furious, really scared, times, times really, smoke, really, times feel  
ah, ged, know, going, magic, medication, years, church, lot, work  
good, did, school, good time, got, time, just, know, team, went  
got, yeah, did, going, went, oh, know, account, pretty, tim  
ugh, died, sad, hospital, death, believe, loved ones, dad, divorced, love  
bad, energy, energized, felt, felt bad, energetic, feeling, times, times really, feel  
live, living, mental, absolutely, grace, place, people, group home, home, transitional  
know, did, okay, yeah, people, just, things, bad, got, time  
just, did, said, know, want, mom, cousin, feel, kids, got  
yeah, nick, ex, kevin, ex husband, got, guy, yeah yeah, yeah oh, oh  
work, just, really, time, ah, job, actually, month, kids, ccc  
happy, feel good, good, feel, kept, try stay, popeyes, dependent, pizza, came  
good, times, rode, coaster, roller coaster, remember, time, memorable, roller, memories  
ah, baby, did, american, got, know, said, figured, really, looked  
came, told, came told, stuff house, attorney, husband came told, appointment attorney, appointment attorney said,

---

---

---

told coming, attorney said
